# Supplementary material for: Radiomics based on machine learning algorithms could predict prognosis and postoperative chemotherapy benefits of patients with gastric cancer: a retrospective cohort study
Source: PubMed Central journal article supplement — J Gastrointest Oncol. 2023 Oct 27;14(5):2048–63. doi: 10.21037/jgo-23-627 (PMC10643584; doi:10.21037/jgo-23-627), 2023-10-27
Supplement: jgo-14-05-2048-dss.pdf [file jgo-14-05-2048-dss.pdf]

## Data Sharing Statement

|                     |                                                                                                                                                     |                                                                                                                          |
|---------------------|-----------------------------------------------------------------------------------------------------------------------------------------------------|--------------------------------------------------------------------------------------------------------------------------|
| <b>Article Info</b> | <a href="https://dx.doi.org/10.21037/jgo-23-627">https://dx.doi.org/10.21037/jgo-23-627</a>                                                         |                                                                                                                          |
| <b>Item</b>         | <b>Question</b>                                                                                                                                     | <b>Authors' Response<br/>(place "-" if not applicable)</b>                                                               |
| 1                   | Would you like to share data collected for your study to others?                                                                                    | Yes.                                                                                                                     |
| 2                   | If not, would you like to share the reason for your decision?                                                                                       | -                                                                                                                        |
| 3                   | What data in particular will be shared?                                                                                                             | All clinical characteristics and follow-up data mentioned in the study.                                                  |
| 4                   | Any other documents will be shared? Such as study protocol, statistical analysis plan, informed consent form, clinical study report, analytic code. | The other documents including study protocol, statistical analysis plan, and analytic code, will be shared if requested. |
| 5                   | When will data availability begin?                                                                                                                  | From the publication date.                                                                                               |
| 6                   | When will data availability end?                                                                                                                    | Two years within the publication date.                                                                                   |
| 7                   | To whom will you share the data?                                                                                                                    | Medical oncologists who are interested in studies of radiomics research.                                                 |
| 8                   | For what type of analysis or purpose?                                                                                                               | The analysis of radiomics research for patients with gastric cancer.                                                     |
| 9                   | How or where can the data/documents be obtained?                                                                                                    | Emails could be sent to the address below to obtain the shared data: 1713733619@qq.com.                                  |
| 10                  | Any other restrictions?                                                                                                                             | We may balance the potential benefits and risks for each request and then provide the data that could be shared.         |
