# Supplementary material for: Radiomics based on machine learning algorithms could predict prognosis and postoperative chemotherapy benefits of patients with gastric cancer: a retrospective cohort study
Source: PubMed Central journal article supplement — J Gastrointest Oncol. 2023 Oct 27;14(5):2048–63. doi: 10.21037/jgo-23-627 (PMC10643584; doi:10.21037/jgo-23-627), 2023-10-27
Supplement: jgo-14-05-2048-rc.pdf [file jgo-14-05-2048-rc.pdf]

# CLEAR Checklist v1.0

**Note:** Use the checklist in conjunction with the main text for clarification of all items.

Yes, details provided; No, details not provided; n/e, not essential; n/a, not applicable; Page, page number

| Section               | No. | Item                                                          | Yes                                 | No                       | n/a                                 | Page |
|-----------------------|-----|---------------------------------------------------------------|-------------------------------------|--------------------------|-------------------------------------|------|
| <b>Title</b>          |     |                                                               |                                     |                          |                                     |      |
|                       | 1   | Relevant title, specifying the radiomic methodology           | <input checked="" type="checkbox"/> | <input type="checkbox"/> | <input type="checkbox"/>            | 1    |
| <b>Abstract</b>       |     |                                                               |                                     |                          |                                     |      |
|                       | 2   | Structured summary with relevant information                  | <input checked="" type="checkbox"/> | <input type="checkbox"/> | <input type="checkbox"/>            | 2-3  |
| <b>Keywords</b>       |     |                                                               |                                     |                          |                                     |      |
|                       | 3   | Relevant keywords for radiomics                               | <input checked="" type="checkbox"/> | <input type="checkbox"/> | <input type="checkbox"/>            | 3    |
| <b>Introduction</b>   |     |                                                               |                                     |                          |                                     |      |
|                       | 4   | Scientific or clinical background                             | <input checked="" type="checkbox"/> | <input type="checkbox"/> | <input type="checkbox"/>            | 5    |
|                       | 5   | Rationale for using a radiomic approach                       | <input checked="" type="checkbox"/> | <input type="checkbox"/> | <input type="checkbox"/>            | 5-6  |
|                       | 6   | Study objective(s)                                            | <input checked="" type="checkbox"/> | <input type="checkbox"/> | <input type="checkbox"/>            | 6    |
| <b>Method</b>         |     |                                                               |                                     |                          |                                     |      |
| <i>Study Design</i>   | 7   | Adherence to guidelines or checklists (e.g., CLEAR checklist) | <input checked="" type="checkbox"/> | <input type="checkbox"/> | <input type="checkbox"/>            | 8    |
|                       | 8   | Ethical details (e.g., approval, consent, data protection)    | <input checked="" type="checkbox"/> | <input type="checkbox"/> | <input type="checkbox"/>            | 7    |
|                       | 9   | Sample size calculation                                       | <input checked="" type="checkbox"/> | <input type="checkbox"/> | <input type="checkbox"/>            | 6-7  |
|                       | 10  | Study nature (e.g., retrospective, prospective)               | <input checked="" type="checkbox"/> | <input type="checkbox"/> | <input type="checkbox"/>            | 6    |
|                       | 11  | Eligibility criteria                                          | <input checked="" type="checkbox"/> | <input type="checkbox"/> | <input type="checkbox"/>            | 6    |
|                       | 12  | Flowchart for technical pipeline                              | <input checked="" type="checkbox"/> | <input type="checkbox"/> | <input type="checkbox"/>            | 6    |
| <i>Data</i>           | 13  | Data source (e.g., private, public)                           | <input checked="" type="checkbox"/> | <input type="checkbox"/> | <input type="checkbox"/>            | 6-7  |
|                       | 14  | Data overlap                                                  | <input type="checkbox"/>            | <input type="checkbox"/> | <input checked="" type="checkbox"/> |      |
|                       | 15  | Data split methodology                                        | <input checked="" type="checkbox"/> | <input type="checkbox"/> | <input type="checkbox"/>            | 9    |
|                       | 16  | Imaging protocol (i.e., image acquisition and processing)     | <input checked="" type="checkbox"/> | <input type="checkbox"/> | <input type="checkbox"/>            | 8    |
|                       | 17  | Definition of non-radiomic predictor variables                | <input checked="" type="checkbox"/> | <input type="checkbox"/> | <input type="checkbox"/>            | 7    |
|                       | 18  | Definition of the reference standard (i.e., outcome variable) | <input checked="" type="checkbox"/> | <input type="checkbox"/> | <input type="checkbox"/>            | 7    |
| <i>Segmentation</i>   | 19  | Segmentation strategy                                         | <input checked="" type="checkbox"/> | <input type="checkbox"/> | <input type="checkbox"/>            | 8    |
|                       | 20  | Details of operators performing segmentation                  | <input checked="" type="checkbox"/> | <input type="checkbox"/> | <input type="checkbox"/>            | 8    |
| <i>Pre-processing</i> | 21  | Image pre-processing details                                  | <input checked="" type="checkbox"/> | <input type="checkbox"/> | <input type="checkbox"/>            | 8-9  |
|                       | 22  | Resampling method and its parameters                          | <input checked="" type="checkbox"/> | <input type="checkbox"/> | <input type="checkbox"/>            | 8-9  |
|                       | 23  | Discretization method and its parameters                      | <input checked="" type="checkbox"/> | <input type="checkbox"/> | <input type="checkbox"/>            | 8-9  |

| Section                   | No. | Item                                                               | Yes                                 | No                       | n/a                                 | Page  |
|---------------------------|-----|--------------------------------------------------------------------|-------------------------------------|--------------------------|-------------------------------------|-------|
|                           | 24  | Image types (e.g., original, filtered, transformed)                | <input checked="" type="checkbox"/> | <input type="checkbox"/> | <input type="checkbox"/>            | 8-9   |
| <i>Feature extraction</i> | 25  | Feature extraction method                                          | <input checked="" type="checkbox"/> | <input type="checkbox"/> | <input type="checkbox"/>            | 8     |
|                           | 26  | Feature classes                                                    | <input checked="" type="checkbox"/> | <input type="checkbox"/> | <input type="checkbox"/>            | 9     |
|                           | 27  | Number of features                                                 | <input checked="" type="checkbox"/> | <input type="checkbox"/> | <input type="checkbox"/>            | 9     |
|                           | 28  | Default configuration statement for remaining parameters           | <input checked="" type="checkbox"/> | <input type="checkbox"/> | <input type="checkbox"/>            | 8     |
| <i>Data preparation</i>   | 29  | Handling of missing data                                           | <input checked="" type="checkbox"/> | <input type="checkbox"/> | <input type="checkbox"/>            | 7     |
|                           | 30  | Details of class imbalance                                         | <input type="checkbox"/>            | <input type="checkbox"/> | <input checked="" type="checkbox"/> |       |
|                           | 31  | Details of segmentation reliability analysis                       | <input checked="" type="checkbox"/> | <input type="checkbox"/> | <input type="checkbox"/>            | 9     |
|                           | 32  | Feature scaling details (e.g., normalization, standardization)     | <input checked="" type="checkbox"/> | <input type="checkbox"/> | <input type="checkbox"/>            | 9     |
|                           | 33  | Dimension reduction details                                        | <input checked="" type="checkbox"/> | <input type="checkbox"/> | <input type="checkbox"/>            | 9     |
| <i>Modeling</i>           | 34  | Algorithm details                                                  | <input checked="" type="checkbox"/> | <input type="checkbox"/> | <input type="checkbox"/>            | 9     |
|                           | 35  | Training and tuning details                                        | <input checked="" type="checkbox"/> | <input type="checkbox"/> | <input type="checkbox"/>            | 9     |
|                           | 36  | Handling of confounders                                            | <input type="checkbox"/>            | <input type="checkbox"/> | <input checked="" type="checkbox"/> |       |
|                           | 37  | Model selection strategy                                           | <input checked="" type="checkbox"/> | <input type="checkbox"/> | <input type="checkbox"/>            | 9     |
| <i>Evaluation</i>         | 38  | Testing technique (e.g., internal, external)                       | <input checked="" type="checkbox"/> | <input type="checkbox"/> | <input type="checkbox"/>            | 10    |
|                           | 39  | Performance metrics and rationale for choosing                     | <input checked="" type="checkbox"/> | <input type="checkbox"/> | <input type="checkbox"/>            | 10    |
|                           | 40  | Uncertainty evaluation and measures (e.g., confidence intervals)   | <input checked="" type="checkbox"/> | <input type="checkbox"/> | <input type="checkbox"/>            | 10    |
|                           | 41  | Statistical performance comparison (e.g., DeLong's test)           | <input checked="" type="checkbox"/> | <input type="checkbox"/> | <input type="checkbox"/>            | 10    |
|                           | 42  | Comparison with non-radiomic and combined methods                  | <input checked="" type="checkbox"/> | <input type="checkbox"/> | <input type="checkbox"/>            | 10    |
|                           | 43  | Interpretability and explainability methods                        | <input checked="" type="checkbox"/> | <input type="checkbox"/> | <input type="checkbox"/>            | 10    |
| <b>Results</b>            |     |                                                                    |                                     |                          |                                     |       |
|                           | 44  | Baseline demographic and clinical characteristics                  | <input checked="" type="checkbox"/> | <input type="checkbox"/> | <input type="checkbox"/>            | 10-11 |
|                           | 45  | Flowchart for eligibility criteria                                 | <input checked="" type="checkbox"/> | <input type="checkbox"/> | <input type="checkbox"/>            | 11    |
|                           | 46  | Feature statistics (e.g., reproducibility, feature selection)      | <input checked="" type="checkbox"/> | <input type="checkbox"/> | <input type="checkbox"/>            | 11    |
|                           | 47  | Model performance evaluation                                       | <input checked="" type="checkbox"/> | <input type="checkbox"/> | <input type="checkbox"/>            | 11-12 |
|                           | 48  | Comparison with non-radiomic and combined approaches               | <input checked="" type="checkbox"/> | <input type="checkbox"/> | <input type="checkbox"/>            | 12-13 |
| <b>Discussion</b>         |     |                                                                    |                                     |                          |                                     |       |
|                           | 49  | Overview of important findings                                     | <input checked="" type="checkbox"/> | <input type="checkbox"/> | <input type="checkbox"/>            | 14    |
|                           | 50  | Previous works with differences from the current study             | <input checked="" type="checkbox"/> | <input type="checkbox"/> | <input type="checkbox"/>            | 14    |
|                           | 51  | Practical implications                                             | <input checked="" type="checkbox"/> | <input type="checkbox"/> | <input type="checkbox"/>            | 14-15 |
|                           | 52  | Strengths and limitations (e.g., bias and generalizability issues) | <input checked="" type="checkbox"/> | <input type="checkbox"/> | <input type="checkbox"/>            | 15    |

| Section                   | No. | Item                                              | Yes                                 | No                                  | n/a                                 | Page                 |
|---------------------------|-----|---------------------------------------------------|-------------------------------------|-------------------------------------|-------------------------------------|----------------------|
| <b>Open Science</b>       |     |                                                   |                                     |                                     |                                     |                      |
| <i>Data availability</i>  | 53  | Sharing images along with segmentation data [n/e] | <input type="checkbox"/>            | <input checked="" type="checkbox"/> | <input type="checkbox"/>            | <input type="text"/> |
|                           | 54  | Sharing radiomic feature data                     | <input checked="" type="checkbox"/> | <input type="checkbox"/>            | <input type="checkbox"/>            | 16                   |
| <i>Code availability</i>  | 55  | Sharing pre-processing scripts or settings        | <input checked="" type="checkbox"/> | <input type="checkbox"/>            | <input type="checkbox"/>            | 8-9                  |
|                           | 56  | Sharing source code for modeling                  | <input checked="" type="checkbox"/> | <input type="checkbox"/>            | <input type="checkbox"/>            | 16                   |
| <i>Model availability</i> | 57  | Sharing final model files                         | <input checked="" type="checkbox"/> | <input type="checkbox"/>            | <input type="checkbox"/>            | 16                   |
|                           | 58  | Sharing a ready-to-use system [n/e]               | <input type="checkbox"/>            | <input type="checkbox"/>            | <input checked="" type="checkbox"/> | <input type="text"/> |

Kocak B, Baessler B, Bakas S, Cuocolo R, Fedorov A, Maier-Hein L, Mercaido N, Müller H, Orhac F, Pinto Dos Santos D, Stanzione A, Ugga L, Zwanenburg A. CheckList for EvaluAtion of Radiomics research (CLEAR): a step-by-step reporting guideline for authors and reviewers endorsed by ESR and EuSoMII. *Insights Imaging*. 2023 May 4;14(1):75. doi: 10.1186/s13244-023-01415-8

Article information: <https://dx.doi.org/10.21037/jgo-23-627>

## TRIPOD Checklist: Prediction Model Development and Validation

| Section                   | Item |     | Checklist description                                                                                                                                                                            | Reported on Page Number/Line Number | Reported on Section/Paragraph |
|---------------------------|------|-----|--------------------------------------------------------------------------------------------------------------------------------------------------------------------------------------------------|-------------------------------------|-------------------------------|
| <b>Title and abstract</b> |      |     |                                                                                                                                                                                                  |                                     |                               |
| Title                     | 1    | D;V | Identify the study as developing and/or validating a multivariable prediction model, the target population, and the outcome to be predicted.                                                     |                                     |                               |
| Abstract                  | 2    | D;V | Provide a summary of objectives, study design, setting, participants, sample size, predictors, outcome, statistical analysis, results, and conclusions.                                          |                                     |                               |
| <b>Introduction</b>       |      |     |                                                                                                                                                                                                  |                                     |                               |
| Background and objectives | 3a   | D;V | Explain the medical context (including whether diagnostic or prognostic) and rationale for developing or validating the multivariable prediction model, including references to existing models. |                                     |                               |
|                           | 3b   | D;V | Specify the objectives, including whether the study describes the development or validation of the model or both.                                                                                |                                     |                               |
| <b>Methods</b>            |      |     |                                                                                                                                                                                                  |                                     |                               |
| Source of data            | 4a   | D;V | Describe the study design or source of data (e.g., randomized trial, cohort, or registry data), separately for the development and validation data sets, if applicable.                          |                                     |                               |
|                           | 4b   | D;V | Specify the key study dates, including start of accrual; end of accrual; and, if applicable, end of follow-up.                                                                                   |                                     |                               |
| Participants              | 5a   | D;V | Specify key elements of the study setting (e.g., primary care, secondary care, general population) including number and location of centres.                                                     |                                     |                               |
|                           | 5b   | D;V | Describe eligibility criteria for participants.                                                                                                                                                  |                                     |                               |
|                           | 5c   | D;V | Give details of treatments received, if relevant.                                                                                                                                                |                                     |                               |
| Outcome                   | 6a   | D;V | Clearly define the outcome that is predicted by the prediction model, including how and when assessed.                                                                                           |                                     |                               |
|                           | 6b   | D;V | Report any actions to blind assessment of the outcome to be predicted.                                                                                                                           |                                     |                               |
| Predictors                | 7a   | D;V | Clearly define all predictors used in developing or validating the multivariable prediction model, including how and when they were measured.                                                    |                                     |                               |
|                           | 7b   | D;V | Report any actions to blind assessment of predictors for the outcome and other predictors.                                                                                                       |                                     |                               |
| Sample size               | 8    | D;V | Explain how the study size was arrived at.                                                                                                                                                       |                                     |                               |

|                              |     |     |                                                                                                                                                                                                       |  |  |
|------------------------------|-----|-----|-------------------------------------------------------------------------------------------------------------------------------------------------------------------------------------------------------|--|--|
| Missing data                 | 9   | D;V | Describe how missing data were handled (e.g., complete-case analysis, single imputation, multiple imputation) with details of any imputation method.                                                  |  |  |
| Statistical analysis methods | 10a | D   | Describe how predictors were handled in the analyses.                                                                                                                                                 |  |  |
|                              | 10b | D   | Specify type of model, all model-building procedures (including any predictor selection), and method for internal validation.                                                                         |  |  |
|                              | 10c | V   | For validation, describe how the predictions were calculated.                                                                                                                                         |  |  |
|                              | 10d | D;V | Specify all measures used to assess model performance and, if relevant, to compare multiple models.                                                                                                   |  |  |
|                              | 10e | V   | Describe any model updating (e.g., recalibration) arising from the validation, if done.                                                                                                               |  |  |
| Risk groups                  | 11  | D;V | Provide details on how risk groups were created, if done.                                                                                                                                             |  |  |
| Development vs. validation   | 12  | V   | For validation, identify any differences from the development data in setting, eligibility criteria, outcome, and predictors.                                                                         |  |  |
| <b>Results</b>               |     |     |                                                                                                                                                                                                       |  |  |
| Participants                 | 13a | D;V | Describe the flow of participants through the study, including the number of participants with and without the outcome and, if applicable, a summary of the follow-up time. A diagram may be helpful. |  |  |
|                              | 13b | D;V | Describe the characteristics of the participants (basic demographics, clinical features, available predictors), including the number of participants with missing data for predictors and outcome.    |  |  |
|                              | 13c | V   | For validation, show a comparison with the development data of the distribution of important variables (demographics, predictors and outcome).                                                        |  |  |
| Model development            | 14a | D   | Specify the number of participants and outcome events in each analysis.                                                                                                                               |  |  |
|                              | 14b | D   | If done, report the unadjusted association between each candidate predictor and outcome.                                                                                                              |  |  |
| Model specification          | 15a | D   | Present the full prediction model to allow predictions for individuals (i.e., all regression coefficients, and model intercept or baseline survival at a given time point).                           |  |  |
|                              | 15b | D   | Explain how to use the prediction model.                                                                                                                                                              |  |  |
| Model performance            | 16  | D;V | Report performance measures (with CIs) for the prediction model.                                                                                                                                      |  |  |
| Model-updating               | 17  | V   | If done, report the results from any model updating (i.e., model specification, model performance).                                                                                                   |  |  |
| <b>Discussion</b>            |     |     |                                                                                                                                                                                                       |  |  |
| Limitations                  | 18  | D;V | Discuss any limitations of the study (such as nonrepresentative sample, few events per predictor, missing data).                                                                                      |  |  |

|                           |     |     |                                                                                                                                                    |  |  |
|---------------------------|-----|-----|----------------------------------------------------------------------------------------------------------------------------------------------------|--|--|
| Interpretation            | 19a | V   | For validation, discuss the results with reference to performance in the development data, and any other validation data.                          |  |  |
|                           | 19b | D;V | Give an overall interpretation of the results, considering objectives, limitations, and results from similar studies, and other relevant evidence. |  |  |
| Implications              | 20  | D;V | Discuss the potential clinical use of the model and implications for future research.                                                              |  |  |
| <b>Other information</b>  |     |     |                                                                                                                                                    |  |  |
| Supplementary information | 21  | D;V | Provide information about the availability of supplementary resources, such as study protocol, Web calculator, and data sets.                      |  |  |
| Funding                   | 22  | D;V | Give the source of funding and the role of the funders for the present study.                                                                      |  |  |

\* Items relevant only to the development of a prediction model are denoted by D, items relating solely to a validation of a prediction model are denoted by V, and items relating to both are denoted D;V. We recommend using the TRIPOD Checklist in conjunction with the TRIPOD Explanation and Elaboration document.
