# Supplementary material for: Radiomics based on machine learning algorithms could predict prognosis and postoperative chemotherapy benefits of patients with gastric cancer: a retrospective cohort study
Source: PubMed Central journal article supplement — J Gastrointest Oncol. 2023 Oct 27;14(5):2048–63. doi: 10.21037/jgo-23-627 (PMC10643584; doi:10.21037/jgo-23-627), 2023-10-27
Supplement: jgo-14-05-2048-supplementary.pdf [file jgo-14-05-2048-supplementary.pdf]

**Table S1** Clinicopathological characteristics of the patients in the developing and validation cohorts

| Variables         | All patients (n=171) | GC patients               |                          | P value |
|-------------------|----------------------|---------------------------|--------------------------|---------|
|                   |                      | Developing cohort (n=120) | Validation cohort (n=51) |         |
| Age (years)       |                      |                           |                          | 0.362   |
| ≤70               | 111 (64.9)           | 81 (67.5)                 | 30 (58.8)                |         |
| >70               | 60 (35.1)            | 39 (32.5)                 | 21 (41.2)                |         |
| Gender            |                      |                           |                          | 0.822   |
| Female            | 40 (23.4)            | 27 (22.5)                 | 13 (25.5)                |         |
| Male              | 131 (76.6)           | 93 (77.5)                 | 38 (74.5)                |         |
| BMI               |                      |                           |                          | 0.829   |
| Low               | 9 (5.3)              | 7 (5.8)                   | 2 (3.9)                  |         |
| Normal            | 125 (73.1)           | 86 (71.7)                 | 39 (76.5)                |         |
| High              | 37 (21.6)            | 27 (22.5)                 | 10 (19.6)                |         |
| Anemia            |                      |                           |                          | 0.223   |
| No                | 91 (53.2)            | 68 (56.7)                 | 23 (45.1)                |         |
| Yes               | 80 (46.8)            | 52 (43.3)                 | 28 (54.9)                |         |
| Charlson score    |                      |                           |                          | 0.022*  |
| <2                | 143 (83.6)           | 95 (79.2)                 | 48 (94.1)                |         |
| ≥2                | 28 (16.4)            | 25 (20.8)                 | 3 (5.9)                  |         |
| Location          |                      |                           |                          | 0.340   |
| Cardia            | 33 (19.3)            | 20 (16.7)                 | 13 (25.5)                |         |
| Body              | 38 (22.2)            | 29 (24.2)                 | 9 (17.6)                 |         |
| Pylorus           | 91 (53.2)            | 63 (52.5)                 | 28 (54.9)                |         |
| All               | 9 (5.3)              | 8 (6.7)                   | 1 (2.0)                  |         |
| Tumor size (cm)   |                      |                           |                          | 0.700   |
| <3                | 59 (34.5)            | 43 (35.8)                 | 16 (31.4)                |         |
| ≥3                | 112 (65.5)           | 77 (64.2)                 | 35 (68.6)                |         |
| Nerve invasion    |                      |                           |                          | 0.680   |
| No                | 122 (71.3)           | 84 (70.0)                 | 38 (74.5)                |         |
| Yes               | 49 (28.7)            | 36 (30.0)                 | 13 (25.5)                |         |
| Vascular invasion |                      |                           |                          | 0.499   |
| No                | 130 (76.0)           | 89 (74.2)                 | 41 (80.4)                |         |
| Yes               | 41 (24.0)            | 31 (25.8)                 | 10 (19.6)                |         |
| Stage             |                      |                           |                          | 0.685   |
| Stage I           | 25 (14.6)            | 18 (15.0)                 | 7 (13.7)                 |         |
| Stage II          | 50 (29.2)            | 38 (31.7)                 | 12 (23.5)                |         |
| Stage III         | 92 (53.8)            | 61 (50.8)                 | 31 (60.8)                |         |
| Stage IV          | 4 (2.3)              | 3 (2.5)                   | 1 (2.0)                  |         |

\*, P&lt;0.05.

**Table S2** The result of radiomics quality score in this study

| ID           | Research details                                     | Research purpose                                                               | RQS point |
|--------------|------------------------------------------------------|--------------------------------------------------------------------------------|-----------|
| 1            | Image protocol quality                               | To ensure the repeatability of the experiment                                  | 1.0       |
| 2            | Multiple segmentation                                | To analyze the impact of different segmentation methods on features            | 1.0       |
| 3            | Phantom study                                        | To analyze the impact of different machine types on features                   | 0.0       |
| 4            | Imaging at multiple time points                      | To analyze the impact of temporal heterogeneity, such as organ motion          | 0.0       |
| 5            | Feature reduction or adjustment for multiple testing | To prevent overfitting                                                         | 3.0       |
| 6            | Multivariable analysis                               | To increase the clinical practicality of radiomics                             | 1.0       |
| 7            | Biological correlates                                | To find the connection between radiomics and biological mechanisms             | 0.0       |
| 8            | Cut-off analysis                                     | To reduce the risk of optimistic estimation                                    | 1.0       |
| 9            | Discrimination statistics                            | To reflect the predictive performance of the model                             | 2.0       |
| 10           | Prospective study                                    | To provide the highest level of evidence for radiomics research                | 0.0       |
| 11           | Calibration statistics                               | To reflect the stability of the model                                          | 2.0       |
| 12           | Validation                                           | To increase the credibility of the model                                       | 2.0       |
| 13           | Comparison to gold standard                          | To demonstrate the additional value of radiomics                               | 0.0       |
| 14           | Cost-effectiveness analysis                          | To report on the clinical significance of radiomics                            | 2.0       |
| 15           | Cost-effectiveness analysis                          | To increase the clinical significance of radiomics                             | 0.0       |
| 16           | Open science and data                                | To promote knowledge transformation and improve the repeatability of radiomics | 3.0       |
| Total points |                                                      |                                                                                | 18.0      |
